# Supplementary material for: Studies on the effect of fluorine on the interaction of different metal ions with a fluorinated azobenzene-Schiff base: intramolecular C–F activation under polar solvent
Source: Royal Society of Chemistry journal article supplement (doi:10.1039/d4nj00637b), 2024-01-01

| Parameter                    | Value                                         |
|------------------------------|-----------------------------------------------|
| 1 Data File Name             | D:/ CHAPTER 1/ NMR/<br>SP_WF_1_proton-1-1.jdf |
| 2 Title                      | SP_WF_1                                       |
| 3 Comment                    | single_pulse                                  |
| 4 Origin                     | JEOL                                          |
| 5 Owner                      |                                               |
| 6 Site                       |                                               |
| 7 Spectrometer               | ECA                                           |
| 8 Author                     | delta                                         |
| 9 Solvent                    |                                               |
| 10 Temperature               |                                               |
| 11 Pulse Sequence            |                                               |
| 12 Number of Scans           | 16                                            |
| 13 Receiver Gain             |                                               |
| 14 Relaxation Delay          | 3.0000                                        |
| 15 Pulse Width               | 3.4650                                        |
| 16 Acquisition Time          | 1.3107                                        |
| 17 Acquisition Date          | 2022-07-14T13:00:13                           |
| 18 Modification Date         | 2022-07-14T13:01:29                           |
| 19 Spectrometer<br>Frequency | 500.16                                        |
| 20 Spectral Width            | 12500.0                                       |
| 21 Lowest Frequency          | -2999.0                                       |
| 22 Nucleus                   | Proton                                        |
| 23 Acquired Size             | 16384                                         |
| 24 Spectral Size             | 32768                                         |

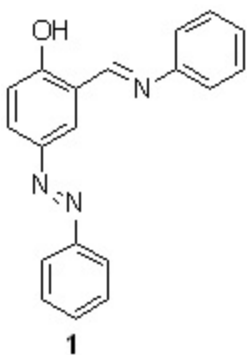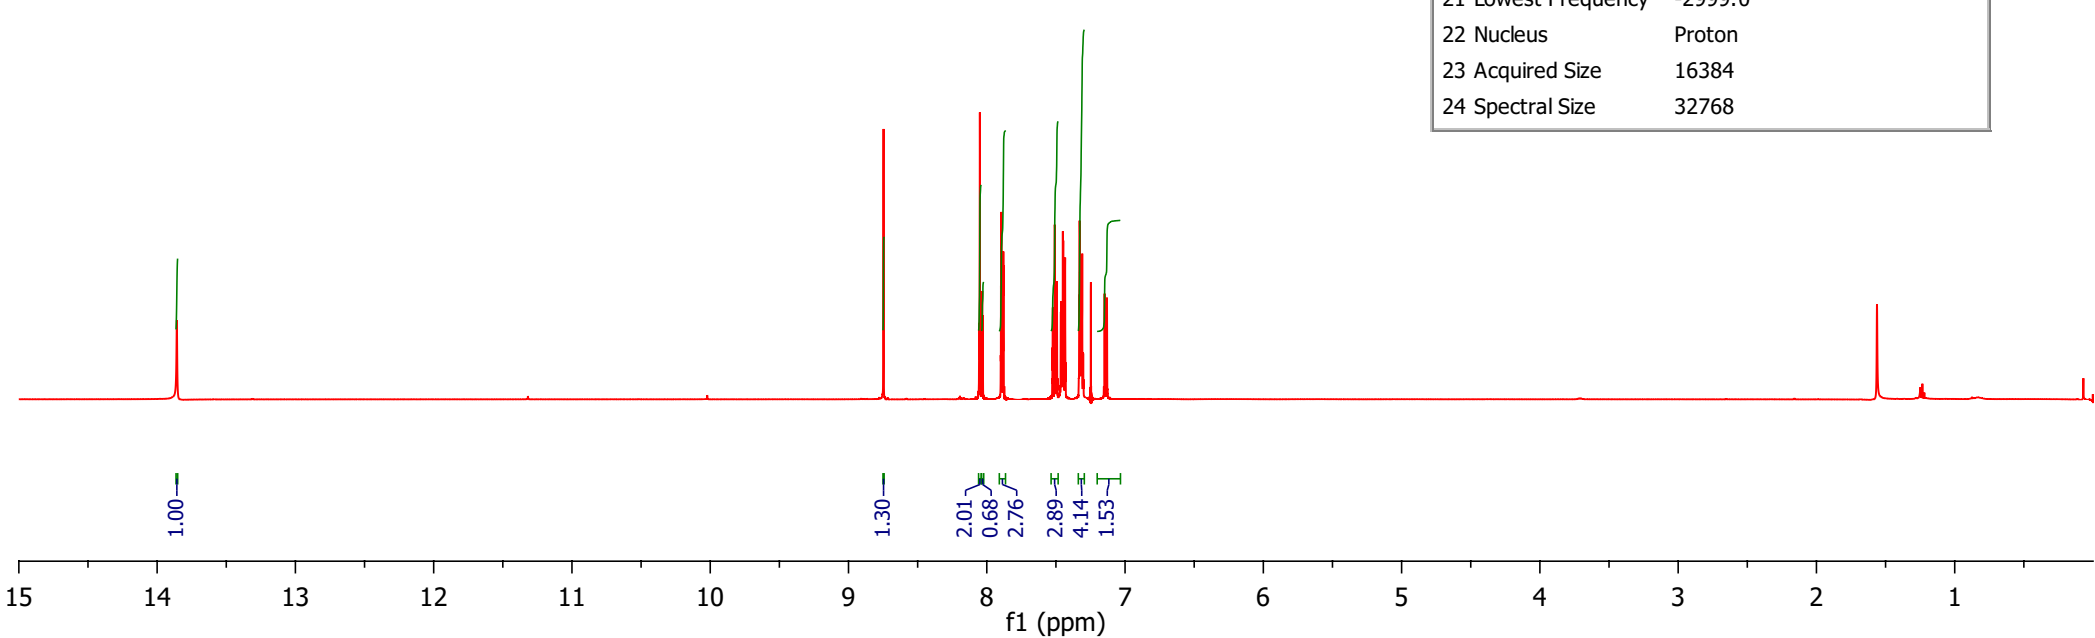

| Parameter                 | Value                                                                                                      |
|---------------------------|------------------------------------------------------------------------------------------------------------|
| 1 Data File Name          | D:/ Drive-16GB/ SAMRIDHI/ bruker data/ samridhi- chapter-1/ Final/ MONO-F-UP- SCHIFF BASE/ SP-F-1/ 10/ fid |
| 2 Title                   | SP-F-1                                                                                                     |
| 3 Comment                 | SP-F-1                                                                                                     |
| 4 Origin                  | Bruker BioSpin GmbH                                                                                        |
| 5 Owner                   | nmr                                                                                                        |
| 6 Site                    |                                                                                                            |
| 7 Spectrometer            | spect                                                                                                      |
| 8 Author                  |                                                                                                            |
| 9 Solvent                 | CDCI3                                                                                                      |
| 10 Temperature            | 298.0                                                                                                      |
| 11 Pulse Sequence         | zg30                                                                                                       |
| 12 Number of Scans        | 16                                                                                                         |
| 13 Receiver Gain          | 55                                                                                                         |
| 14 Relaxation Delay       | 1.0000                                                                                                     |
| 15 Pulse Width            | 13.3000                                                                                                    |
| 16 Acquisition Time       | 4.0894                                                                                                     |
| 17 Acquisition Date       | 2022-06-06T13:10:37                                                                                        |
| 18 Modification Date      | 2022-06-06T13:10:38                                                                                        |
| 19 Spectrometer Frequency | 400.13                                                                                                     |
| 20 Spectral Width         | 8012.8                                                                                                     |
| 21 Lowest Frequency       | -1546.1                                                                                                    |
| 22 Nucleus                | 1H                                                                                                         |
| 23 Acquired Size          | 32768                                                                                                      |
| 24 Spectral Size          | 65536                                                                                                      |

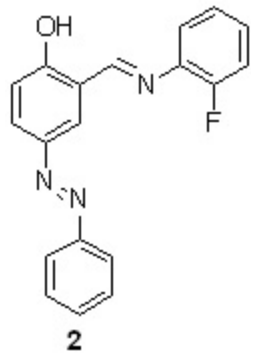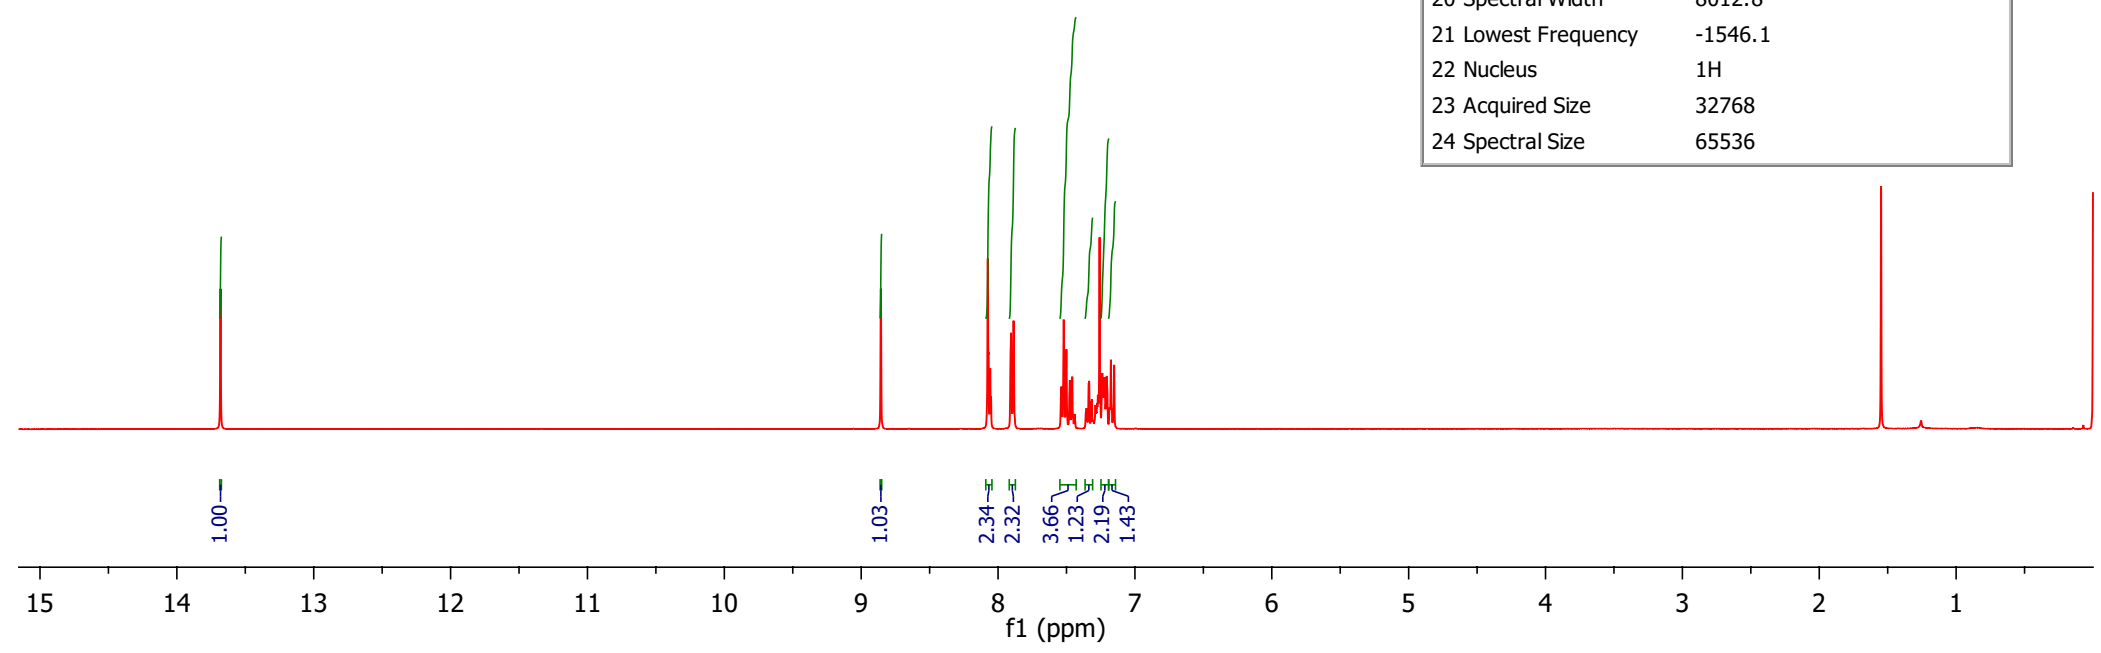

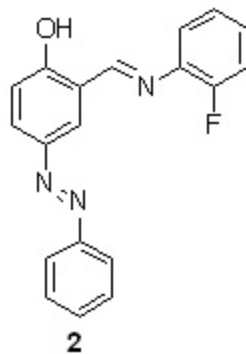

| Parameter                 | Value                                                                                           |
|---------------------------|-------------------------------------------------------------------------------------------------|
| 1 Data File Name          | D:/ Drive-16GB/ SAMRIDHI/ bruker data/ samridhi-chapter-1/ Final/ MONO-F-UP-SCHIFF BASE/ 3/ fid |
| 2 Title                   | SP-F-1                                                                                          |
| 3 Comment                 | SP-F-1                                                                                          |
| 4 Origin                  | Bruker BioSpin GmbH                                                                             |
| 5 Owner                   | nmr                                                                                             |
| 6 Site                    |                                                                                                 |
| 7 Spectrometer            | spect                                                                                           |
| 8 Author                  |                                                                                                 |
| 9 Solvent                 | CDCI3                                                                                           |
| 10 Temperature            | 298.4                                                                                           |
| 11 Pulse Sequence         | zgfhigqn.2                                                                                      |
| 12 Number of Scans        | 16                                                                                              |
| 13 Receiver Gain          | 196                                                                                             |
| 14 Relaxation Delay       | 1.0000                                                                                          |
| 15 Pulse Width            | 30.0000                                                                                         |
| 16 Acquisition Time       | 0.7340                                                                                          |
| 17 Acquisition Date       | 2021-10-05T16:37:35                                                                             |
| 18 Modification Date      | 2021-10-05T16:37:36                                                                             |
| 19 Spectrometer Frequency | 376.50                                                                                          |
| 20 Spectral Width         | 89285.7                                                                                         |
| 21 Lowest Frequency       | -82292.7                                                                                        |
| 22 Nucleus                | 19F                                                                                             |
| 23 Acquired Size          | 65536                                                                                           |
| 24 Spectral Size          | 131072                                                                                          |

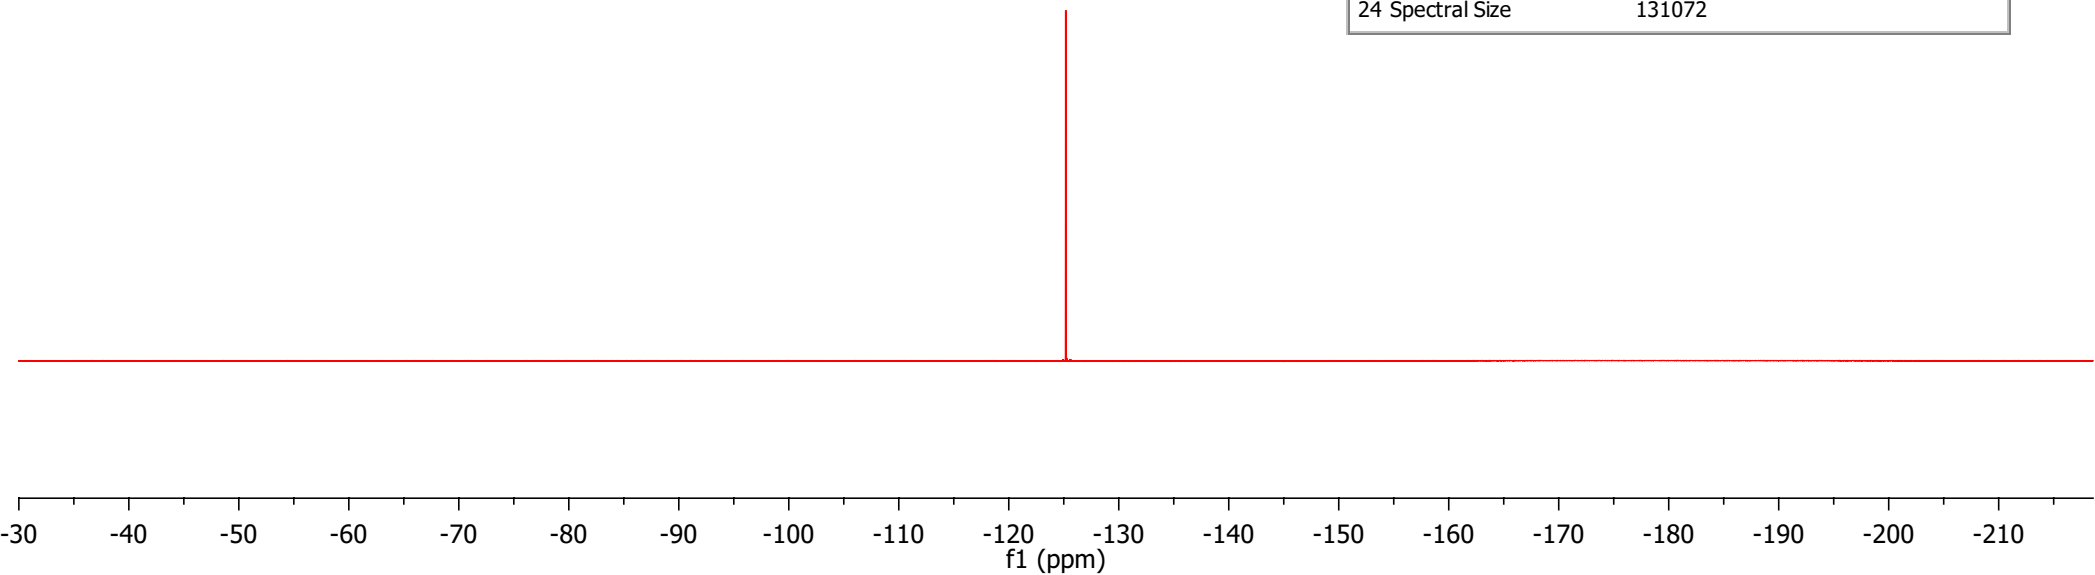

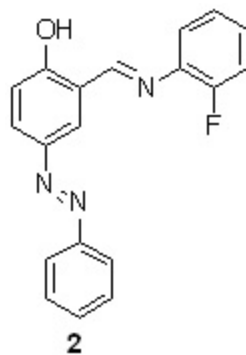

| Parameter                 | Value                                                |
|---------------------------|------------------------------------------------------|
| 1 Data File Name          | C:/Users/S/Desktop/NMR-CH-1/C-4-Na-24hr/C-2-F/10/fid |
| 2 Title                   | C-2-F                                                |
| 3 Comment                 | C-2-F                                                |
| 4 Origin                  | Bruker BioSpin GmbH                                  |
| 5 Owner                   | nmr                                                  |
| 6 Site                    |                                                      |
| 7 Spectrometer            | spect                                                |
| 8 Author                  |                                                      |
| 9 Solvent                 | DMSO                                                 |
| 10 Temperature            | 294.0                                                |
| 11 Pulse Sequence         | zgflqg                                               |
| 12 Number of Scans        | 16                                                   |
| 13 Receiver Gain          | 196                                                  |
| 14 Relaxation Delay       | 1.0000                                               |
| 15 Pulse Width            | 30.0000                                              |
| 16 Acquisition Time       | 0.7340                                               |
| 17 Acquisition Date       | 2023-05-24T13:43:48                                  |
| 18 Modification Date      | 2023-05-26T13:35:55                                  |
| 19 Spectrometer Frequency | 376.50                                               |
| 20 Spectral Width         | 89285.7                                              |
| 21 Lowest Frequency       | -82292.7                                             |
| 22 Nucleus                | <sup>19</sup> F                                      |
| 23 Acquired Size          | 65536                                                |
| 24 Spectral Size          | 131072                                               |

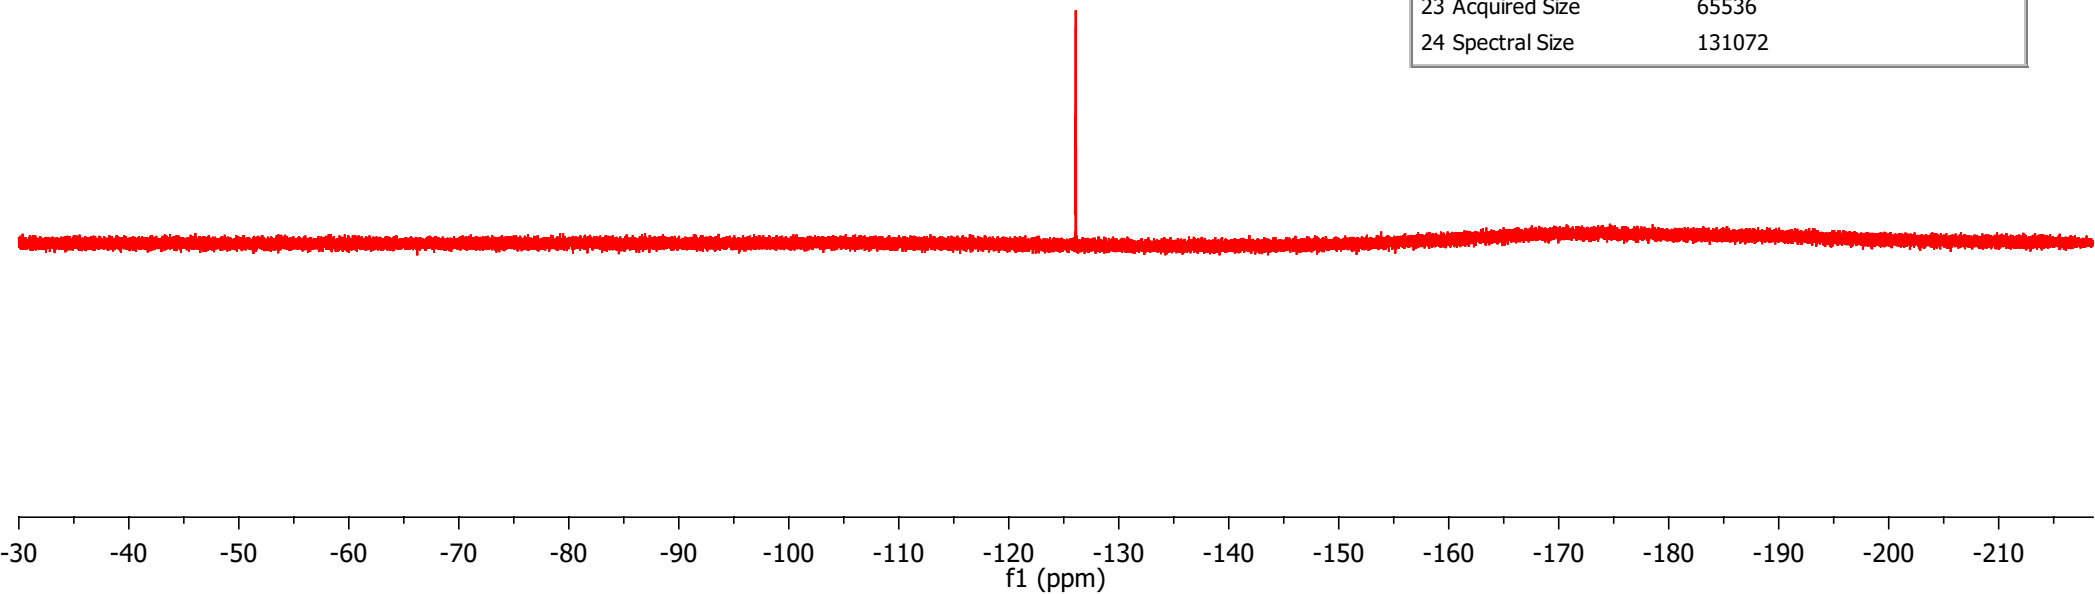

| Parameter                 | Value                                                                                                     |
|---------------------------|-----------------------------------------------------------------------------------------------------------|
| 1 Data File Name          | D:/ Drive-16GB/ SAMRIDHI/ bruker data/ samridhi- chapter-1/ Final/ difluoro-schiff base/ SP-DF-1/ 10/ fid |
| 2 Title                   | SP-DF-1                                                                                                   |
| 3 Comment                 | SP-DF-1                                                                                                   |
| 4 Origin                  | Bruker BioSpin GmbH                                                                                       |
| 5 Owner                   | nmr                                                                                                       |
| 6 Site                    |                                                                                                           |
| 7 Spectrometer            | spect                                                                                                     |
| 8 Author                  |                                                                                                           |
| 9 Solvent                 | CDCI3                                                                                                     |
| 10 Temperature            | 298.0                                                                                                     |
| 11 Pulse Sequence         | zg30                                                                                                      |
| 12 Number of Scans        | 16                                                                                                        |
| 13 Receiver Gain          | 55                                                                                                        |
| 14 Relaxation Delay       | 1.0000                                                                                                    |
| 15 Pulse Width            | 13.3000                                                                                                   |
| 16 Acquisition Time       | 4.0894                                                                                                    |
| 17 Acquisition Date       | 2022-06-06T14:49:32                                                                                       |
| 18 Modification Date      | 2022-06-06T14:49:34                                                                                       |
| 19 Spectrometer Frequency | 400.13                                                                                                    |
| 20 Spectral Width         | 8012.8                                                                                                    |
| 21 Lowest Frequency       | -1545.8                                                                                                   |
| 22 Nucleus                | 1H                                                                                                        |
| 23 Acquired Size          | 32768                                                                                                     |
| 24 Spectral Size          | 65536                                                                                                     |

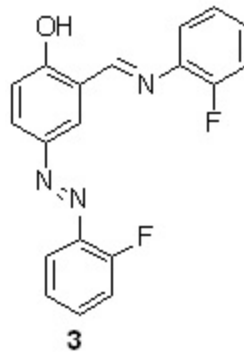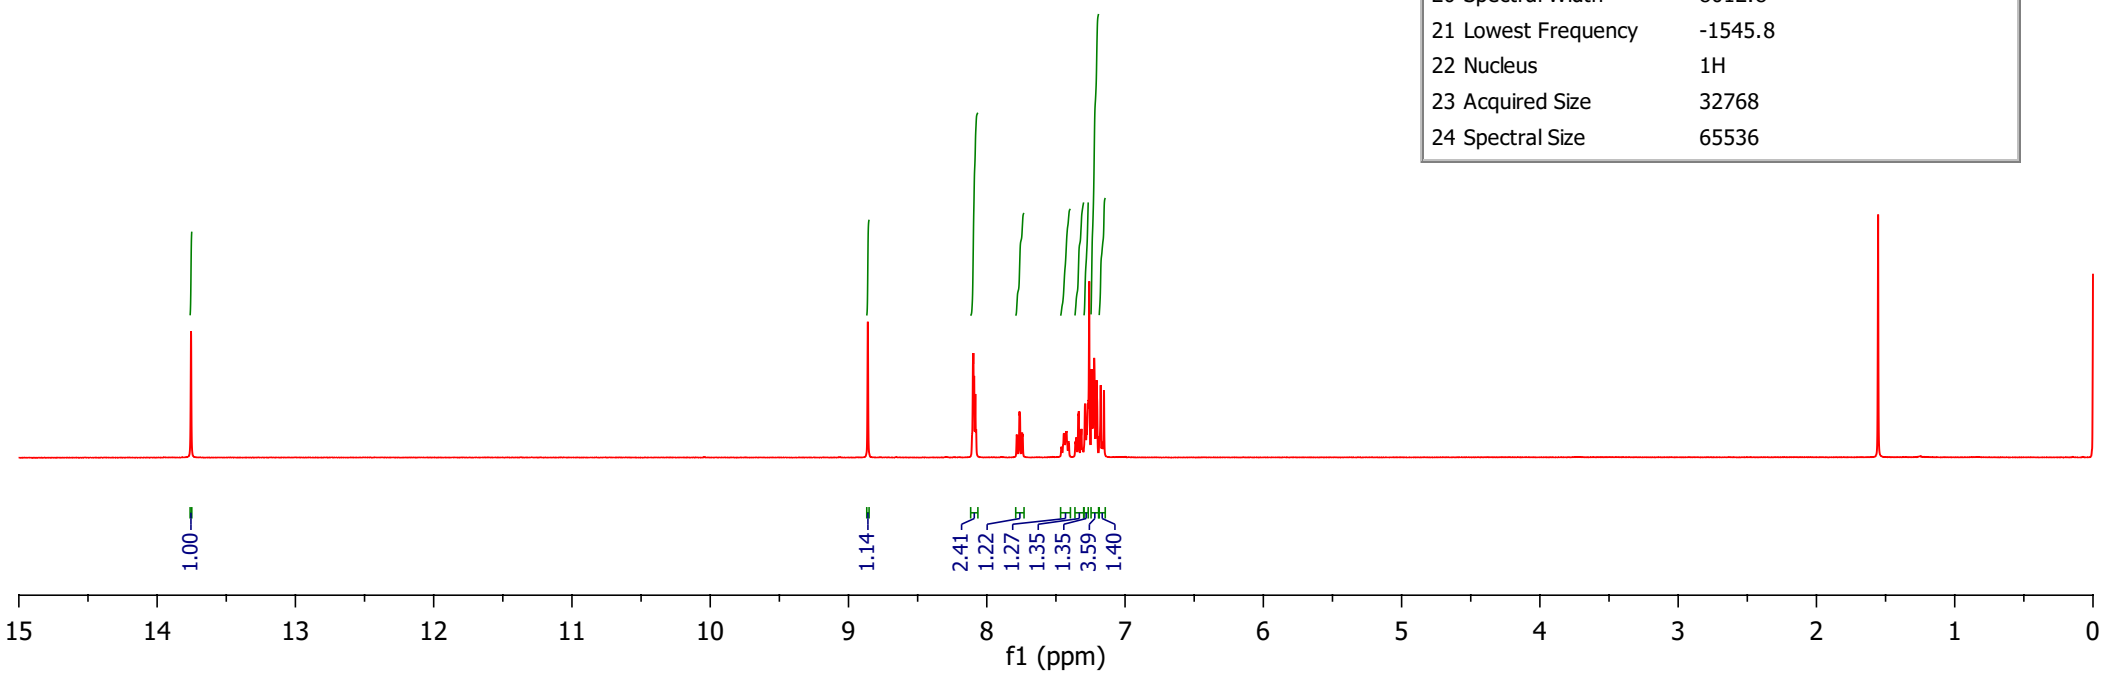

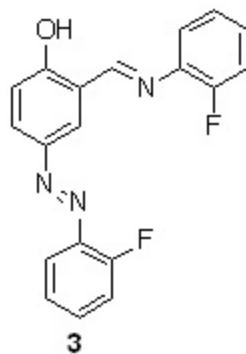

| Parameter                 | Value                                                                  |
|---------------------------|------------------------------------------------------------------------|
| 1 Data File Name          | D:/ Drive-16GB/ SAMRIDHI/bruker data/ New folder (2)/ SP-DF-1/ 11/ fid |
| 2 Title                   | SP-DF-1                                                                |
| 3 Comment                 | SP-DF-1                                                                |
| 4 Origin                  | Bruker BioSpin GmbH                                                    |
| 5 Owner                   | nmr                                                                    |
| 6 Site                    |                                                                        |
| 7 Spectrometer            | spect                                                                  |
| 8 Author                  |                                                                        |
| 9 Solvent                 | CDC13                                                                  |
| 10 Temperature            | 294.5                                                                  |
| 11 Pulse Sequence         | zgflqf                                                                 |
| 12 Number of Scans        | 16                                                                     |
| 13 Receiver Gain          | 196                                                                    |
| 14 Relaxation Delay       | 1.0000                                                                 |
| 15 Pulse Width            | 30.0000                                                                |
| 16 Acquisition Time       | 0.7340                                                                 |
| 17 Acquisition Date       | 2021-11-03T11:14:37                                                    |
| 18 Modification Date      | 2021-11-03T11:14:38                                                    |
| 19 Spectrometer Frequency | 376.50                                                                 |
| 20 Spectral Width         | 89285.7                                                                |
| 21 Lowest Frequency       | -82292.7                                                               |
| 22 Nucleus                | 19F                                                                    |
| 23 Acquired Size          | 65536                                                                  |
| 24 Spectral Size          | 131072                                                                 |

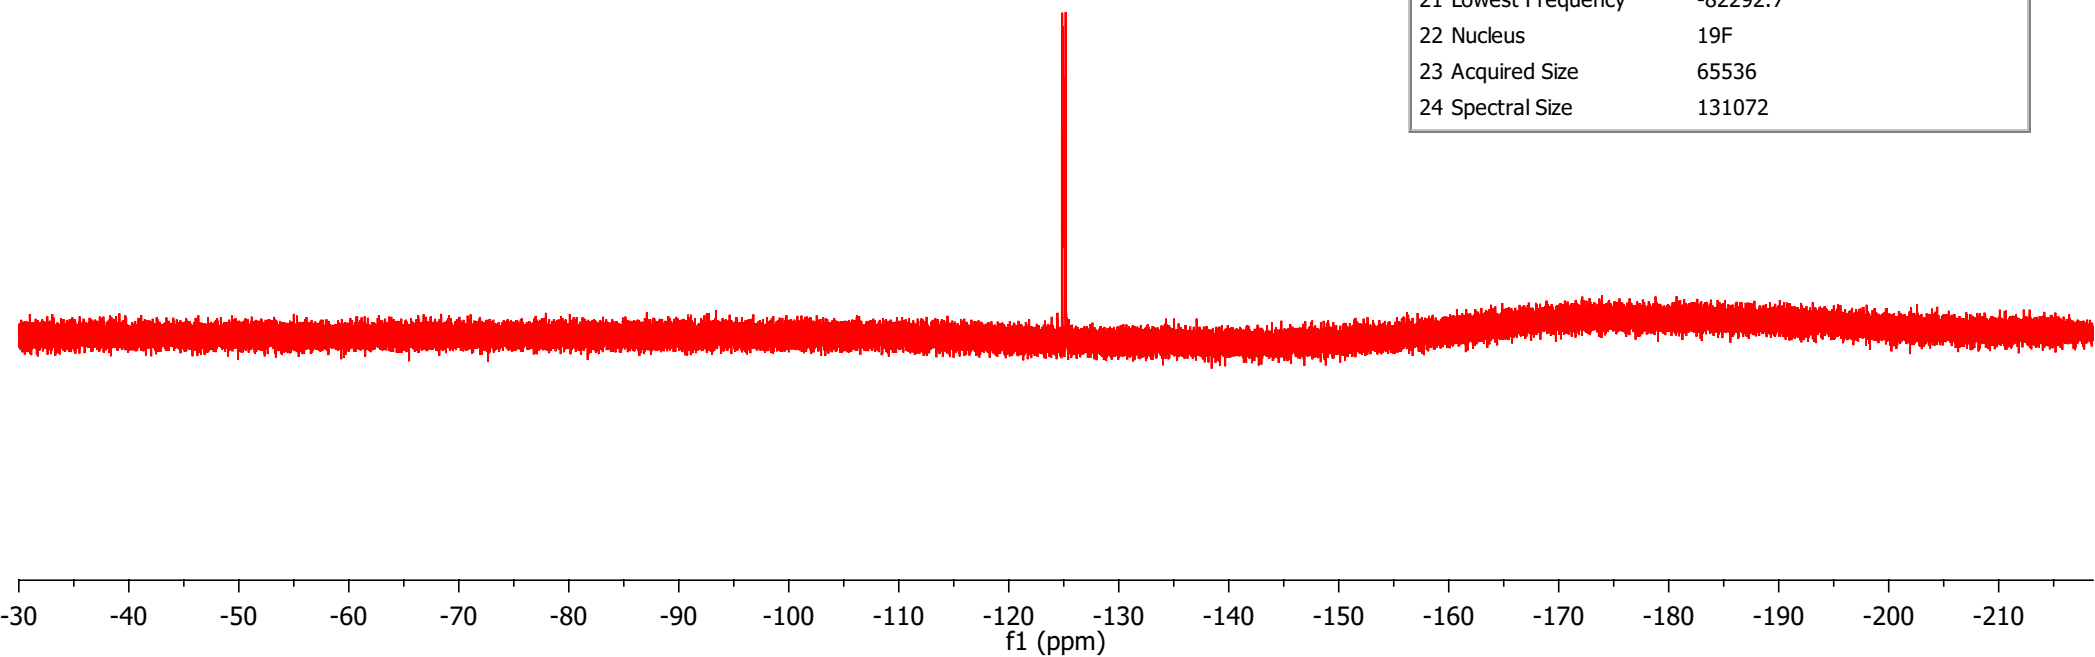

| Parameter                 | Value                                                        |
|---------------------------|--------------------------------------------------------------|
| 1 Data File Name          | C:/ Users/ S/ Desktop/ NMR-CH-1/ DF-Redn/ SP-DF-1-D/ 10/ fid |
| 2 Title                   | SP-DF-1-D                                                    |
| 3 Comment                 | SP-DF-1-D                                                    |
| 4 Origin                  | Bruker BioSpin GmbH                                          |
| 5 Owner                   | nmr                                                          |
| 6 Site                    |                                                              |
| 7 Spectrometer            | spect                                                        |
| 8 Author                  |                                                              |
| 9 Solvent                 | DMSO                                                         |
| 10 Temperature            | 293.6                                                        |
| 11 Pulse Sequence         | zg30                                                         |
| 12 Number of Scans        | 16                                                           |
| 13 Receiver Gain          | 32                                                           |
| 14 Relaxation Delay       | 1.0000                                                       |
| 15 Pulse Width            | 13.3000                                                      |
| 16 Acquisition Time       | 4.0894                                                       |
| 17 Acquisition Date       | 2023-07-10T13:37:32                                          |
| 18 Modification Date      | 2023-07-18T13:29:37                                          |
| 19 Spectrometer Frequency | 400.13                                                       |
| 20 Spectral Width         | 8012.8                                                       |
| 21 Lowest Frequency       | -1535.6                                                      |
| 22 Nucleus                | <sup>1</sup> H                                               |
| 23 Acquired Size          | 32768                                                        |
| 24 Spectral Size          | 65536                                                        |

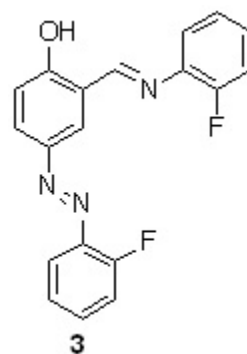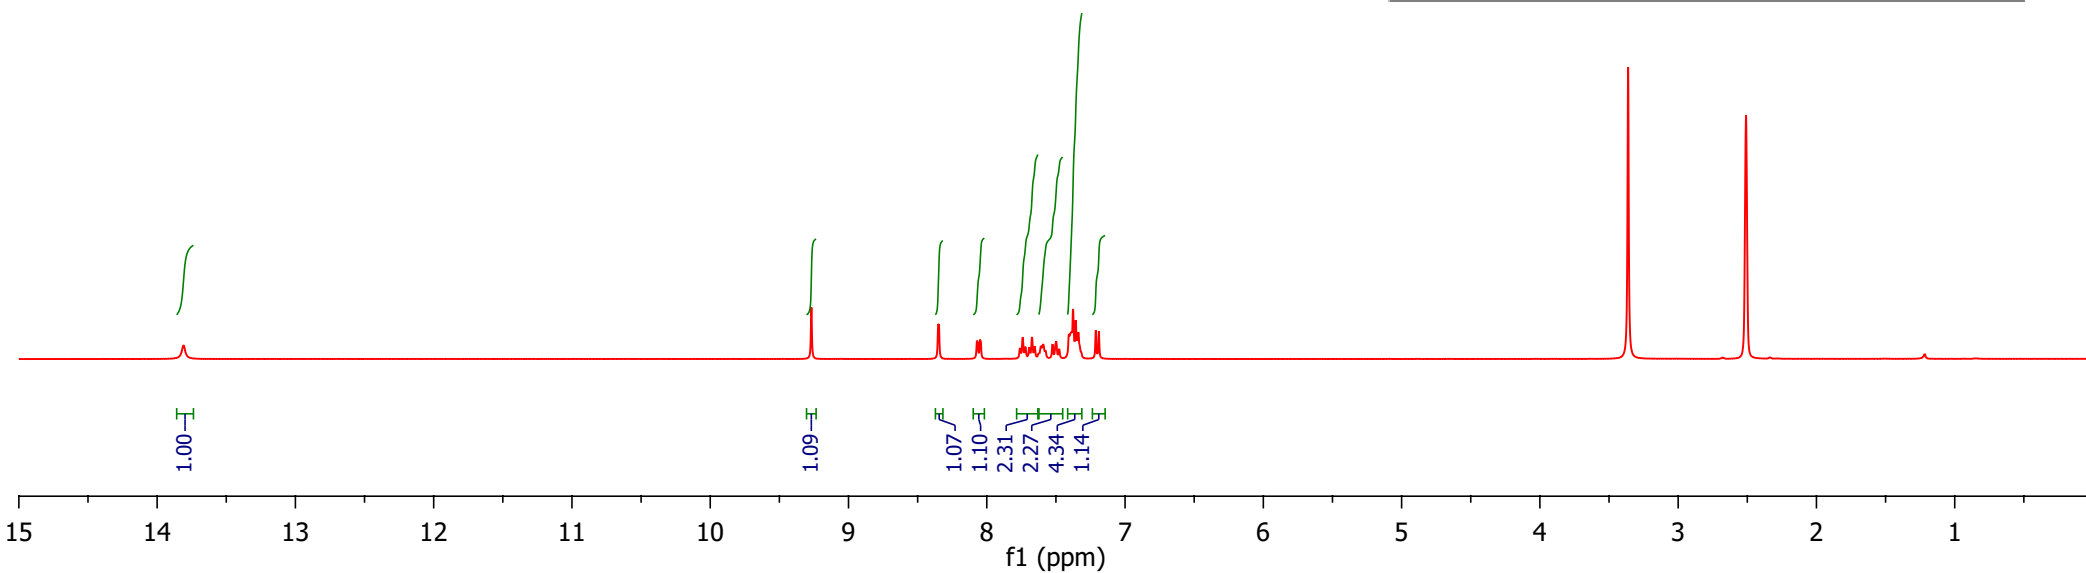



| Parameter                 | Value                                                                                                 |
|---------------------------|-------------------------------------------------------------------------------------------------------|
| 1 Data File Name          | D:/ Drive-16GB/ SAMRIDHI/ bruker data/ samridhi-chapter 2/ titration-difluoro-NaOAc-DMSO-D2O/ 20/ fid |
| 2 Title                   | SP-DF-1                                                                                               |
| 3 Comment                 | SP-DF-1                                                                                               |
| 4 Origin                  | Bruker BioSpin GmbH                                                                                   |
| 5 Owner                   | nmr                                                                                                   |
| 6 Site                    |                                                                                                       |
| 7 Spectrometer            | spect                                                                                                 |
| 8 Author                  |                                                                                                       |
| 9 Solvent                 | DMSO                                                                                                  |
| 10 Temperature            | 296.6                                                                                                 |
| 11 Pulse Sequence         | zgflqn                                                                                                |
| 12 Number of Scans        | 16                                                                                                    |
| 13 Receiver Gain          | 196                                                                                                   |
| 14 Relaxation Delay       | 1.0000                                                                                                |
| 15 Pulse Width            | 30.0000                                                                                               |
| 16 Acquisition Time       | 0.7340                                                                                                |
| 17 Acquisition Date       | 2022-06-07T13:08:47                                                                                   |
| 18 Modification Date      | 2022-06-07T13:08:48                                                                                   |
| 19 Spectrometer Frequency | 376.50                                                                                                |
| 20 Spectral Width         | 89285.7                                                                                               |
| 21 Lowest Frequency       | -82292.7                                                                                              |
| 22 Nucleus                | <sup>19</sup> F                                                                                       |
| 23 Acquired Size          | 65536                                                                                                 |
| 24 Spectral Size          | 131072                                                                                                |

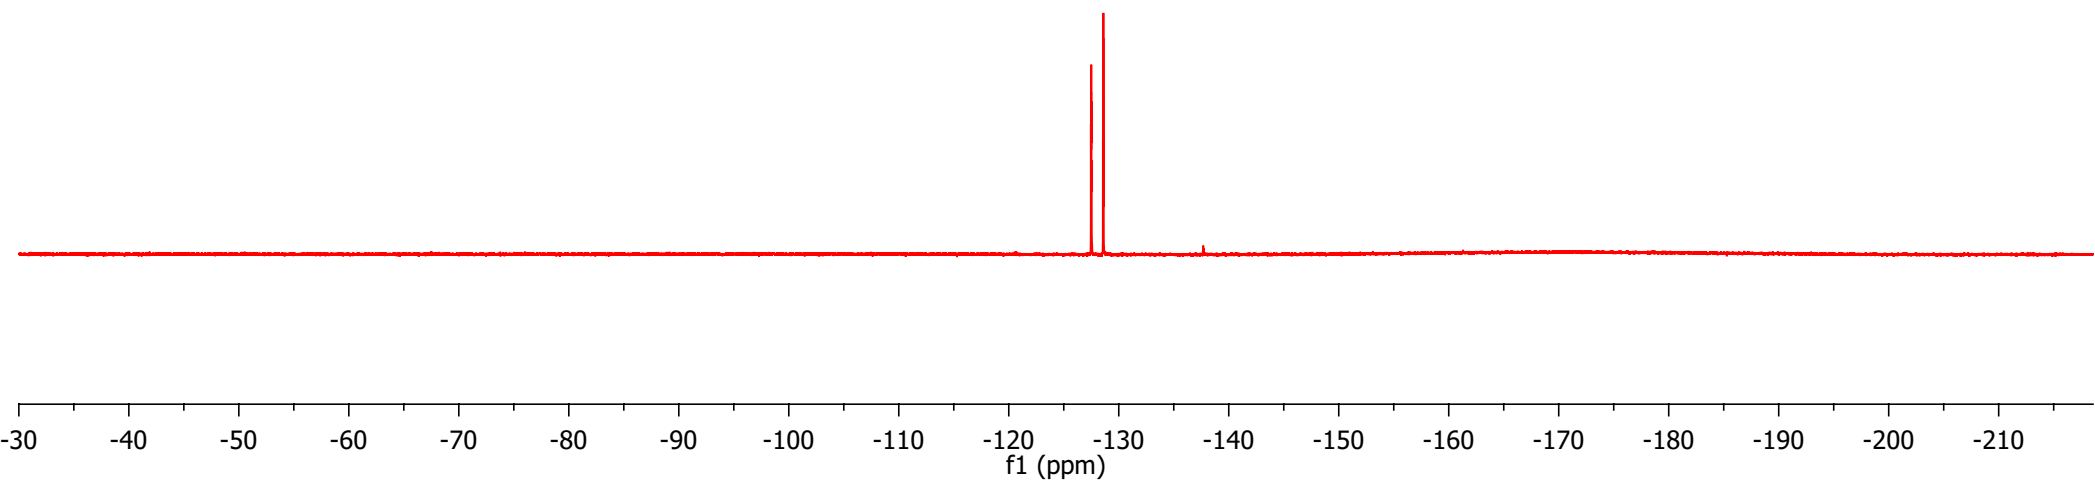



| Parameter                 | Value                                                                                                             |
|---------------------------|-------------------------------------------------------------------------------------------------------------------|
| 1 Data File Name          | D:/ Drive-16GB/ SAMRIDHI/ bruker data/ samridhi-chapter-1/ Final/ MONOFLUORO-DOWN-SCHIFF-BASE/ SKM-52 NMR/ 1/ fid |
| 2 Title                   | SKM-52 NMR                                                                                                        |
| 3 Comment                 | SKM-52-H1                                                                                                         |
| 4 Origin                  | Bruker BioSpin GmbH                                                                                               |
| 5 Owner                   | nmrsu                                                                                                             |
| 6 Site                    |                                                                                                                   |
| 7 Spectrometer            | spect                                                                                                             |
| 8 Author                  |                                                                                                                   |
| 9 Solvent                 | CDCI3                                                                                                             |
| 10 Temperature            | 298.1                                                                                                             |
| 11 Pulse Sequence         | zg30                                                                                                              |
| 12 Number of Scans        | 32                                                                                                                |
| 13 Receiver Gain          | 182                                                                                                               |
| 14 Relaxation Delay       | 1.0000                                                                                                            |
| 15 Pulse Width            | 13.6000                                                                                                           |
| 16 Acquisition Time       | 1.9999                                                                                                            |
| 17 Acquisition Date       | 2022-04-22T22:30:48                                                                                               |
| 18 Modification Date      | 2022-04-22T10:00:50                                                                                               |
| 19 Spectrometer Frequency | 400.28                                                                                                            |
| 20 Spectral Width         | 8012.8                                                                                                            |
| 21 Lowest Frequency       | -1541.6                                                                                                           |
| 22 Nucleus                | 1H                                                                                                                |
| 23 Acquired Size          | 16025                                                                                                             |
| 24 Spectral Size          | 32768                                                                                                             |

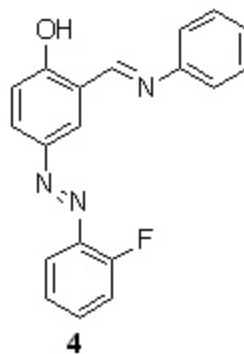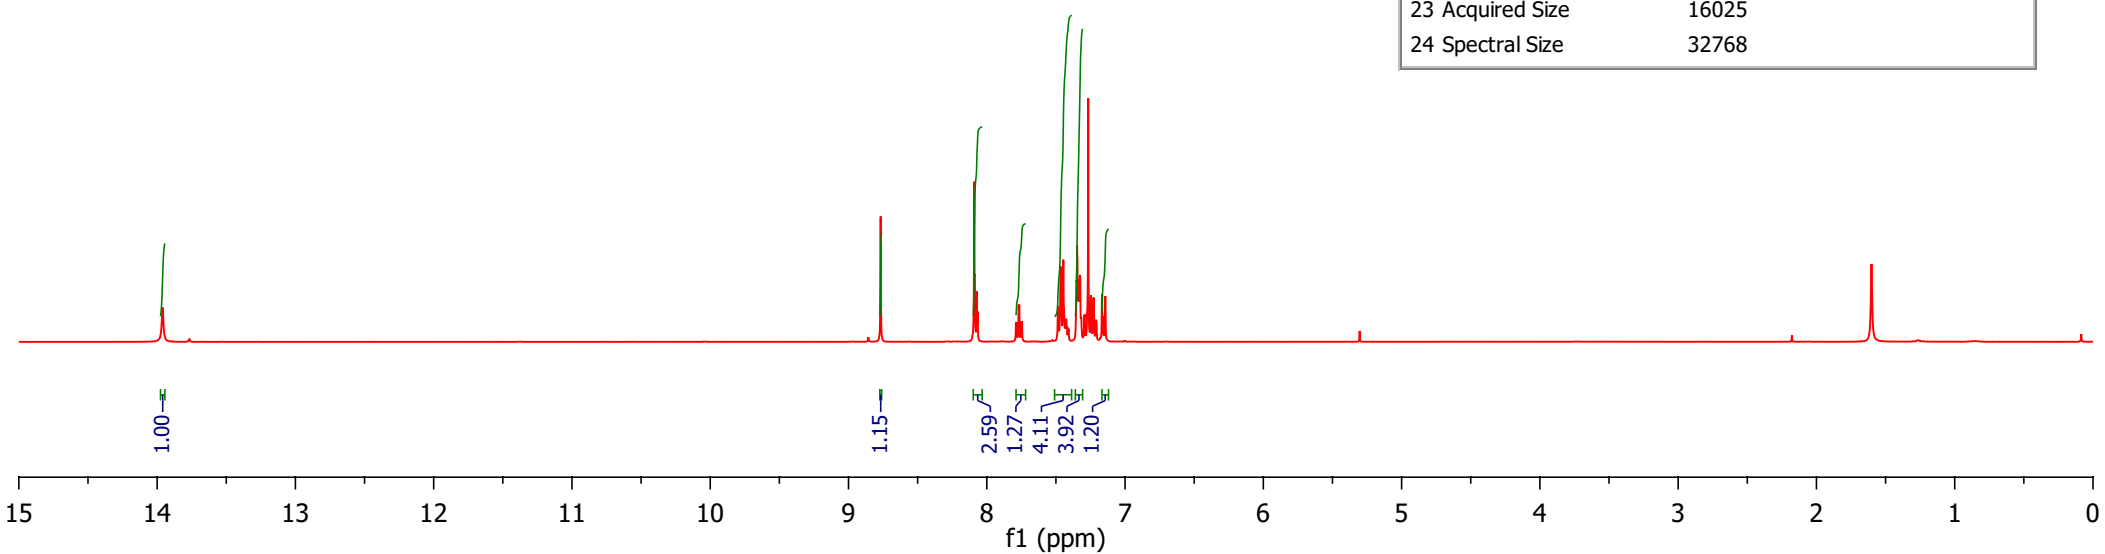

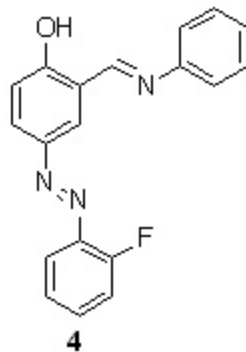

| Parameter                 | Value                                                                                                             |
|---------------------------|-------------------------------------------------------------------------------------------------------------------|
| 1 Data File Name          | D:/ Drive-16GB/ SAMRIDHI/ bruker data/ samridhi-chapter-1/ Final/ MONOFLUORO-DOWN-SCHIFF-BASE/ SKM-52 NMR/ 3/ fid |
| 2 Title                   | SKM-52 NMR                                                                                                        |
| 3 Comment                 | SKM-52-F19                                                                                                        |
| 4 Origin                  | Bruker BioSpin GmbH                                                                                               |
| 5 Owner                   | nmrsu                                                                                                             |
| 6 Site                    |                                                                                                                   |
| 7 Spectrometer            | spect                                                                                                             |
| 8 Author                  |                                                                                                                   |
| 9 Solvent                 | CDCl3                                                                                                             |
| 10 Temperature            | 298.2                                                                                                             |
| 11 Pulse Sequence         | zgfgq                                                                                                             |
| 12 Number of Scans        | 16                                                                                                                |
| 13 Receiver Gain          | 205                                                                                                               |
| 14 Relaxation Delay       | 1.0000                                                                                                            |
| 15 Pulse Width            | 14.5000                                                                                                           |
| 16 Acquisition Time       | 0.7340                                                                                                            |
| 17 Acquisition Date       | 2022-04-22T22:40:10                                                                                               |
| 18 Modification Date      | 2022-04-22T10:10:12                                                                                               |
| 19 Spectrometer Frequency | 376.64                                                                                                            |
| 20 Spectral Width         | 89285.7                                                                                                           |
| 21 Lowest Frequency       | -82306.8                                                                                                          |
| 22 Nucleus                | <sup>19</sup> F                                                                                                   |
| 23 Acquired Size          | 65536                                                                                                             |
| 24 Spectral Size          | 131072                                                                                                            |

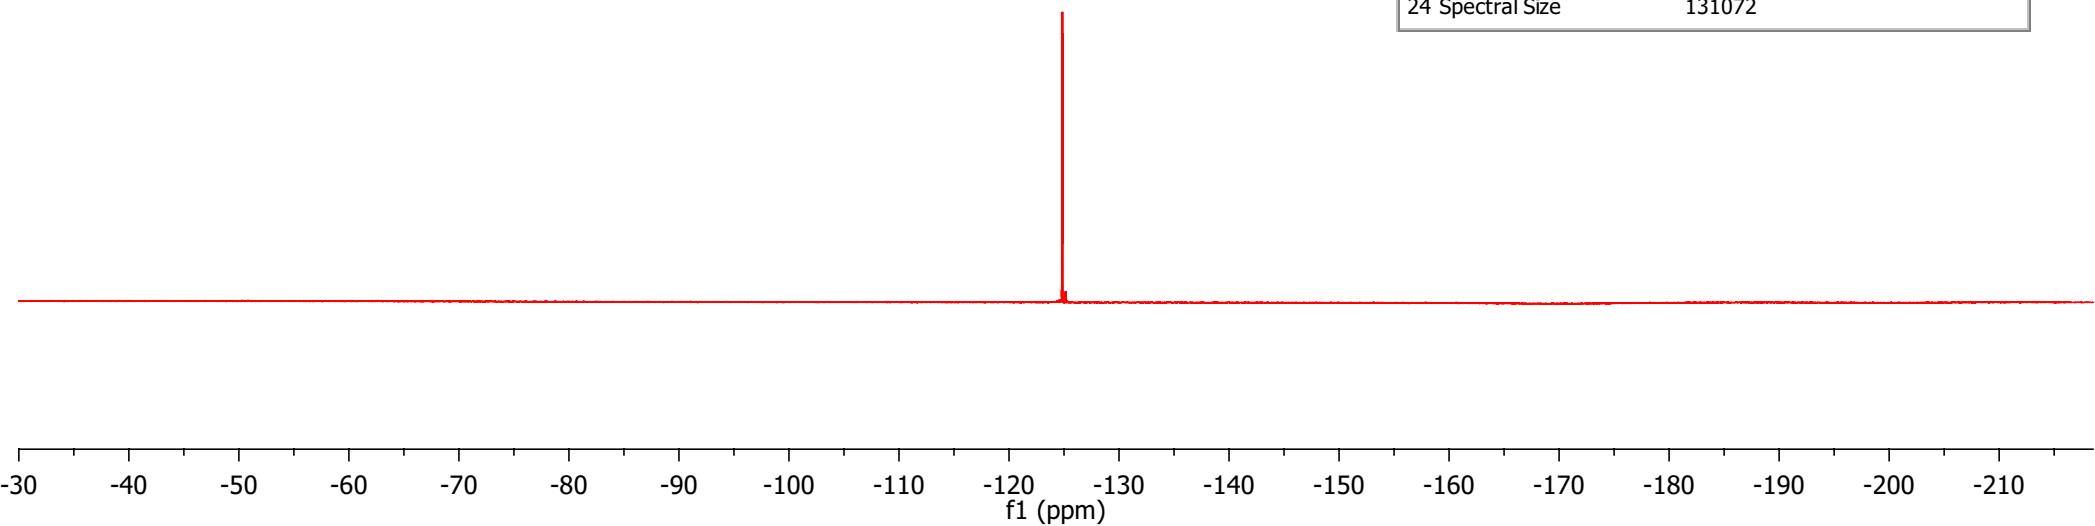

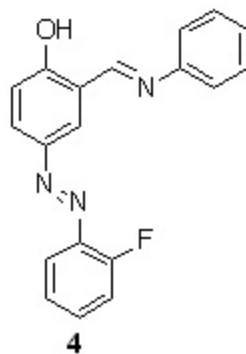

| Parameter                 | Value                                                |
|---------------------------|------------------------------------------------------|
| 1 Data File Name          | C:/Users/S/Desktop/NMR-CH-1/C-4-Na-24hr/C-4-F/10/fid |
| 2 Title                   | C-4-F                                                |
| 3 Comment                 | C-4-F                                                |
| 4 Origin                  | Bruker BioSpin GmbH                                  |
| 5 Owner                   | nmr                                                  |
| 6 Site                    |                                                      |
| 7 Spectrometer            | spect                                                |
| 8 Author                  |                                                      |
| 9 Solvent                 | DMSO                                                 |
| 10 Temperature            | 294.0                                                |
| 11 Pulse Sequence         | zgfgqn                                               |
| 12 Number of Scans        | 16                                                   |
| 13 Receiver Gain          | 196                                                  |
| 14 Relaxation Delay       | 1.0000                                               |
| 15 Pulse Width            | 30.0000                                              |
| 16 Acquisition Time       | 0.7340                                               |
| 17 Acquisition Date       | 2023-05-24T13:48:35                                  |
| 18 Modification Date      | 2023-05-26T13:35:54                                  |
| 19 Spectrometer Frequency | 376.50                                               |
| 20 Spectral Width         | 89285.7                                              |
| 21 Lowest Frequency       | -82292.7                                             |
| 22 Nucleus                | 19F                                                  |
| 23 Acquired Size          | 65536                                                |
| 24 Spectral Size          | 131072                                               |

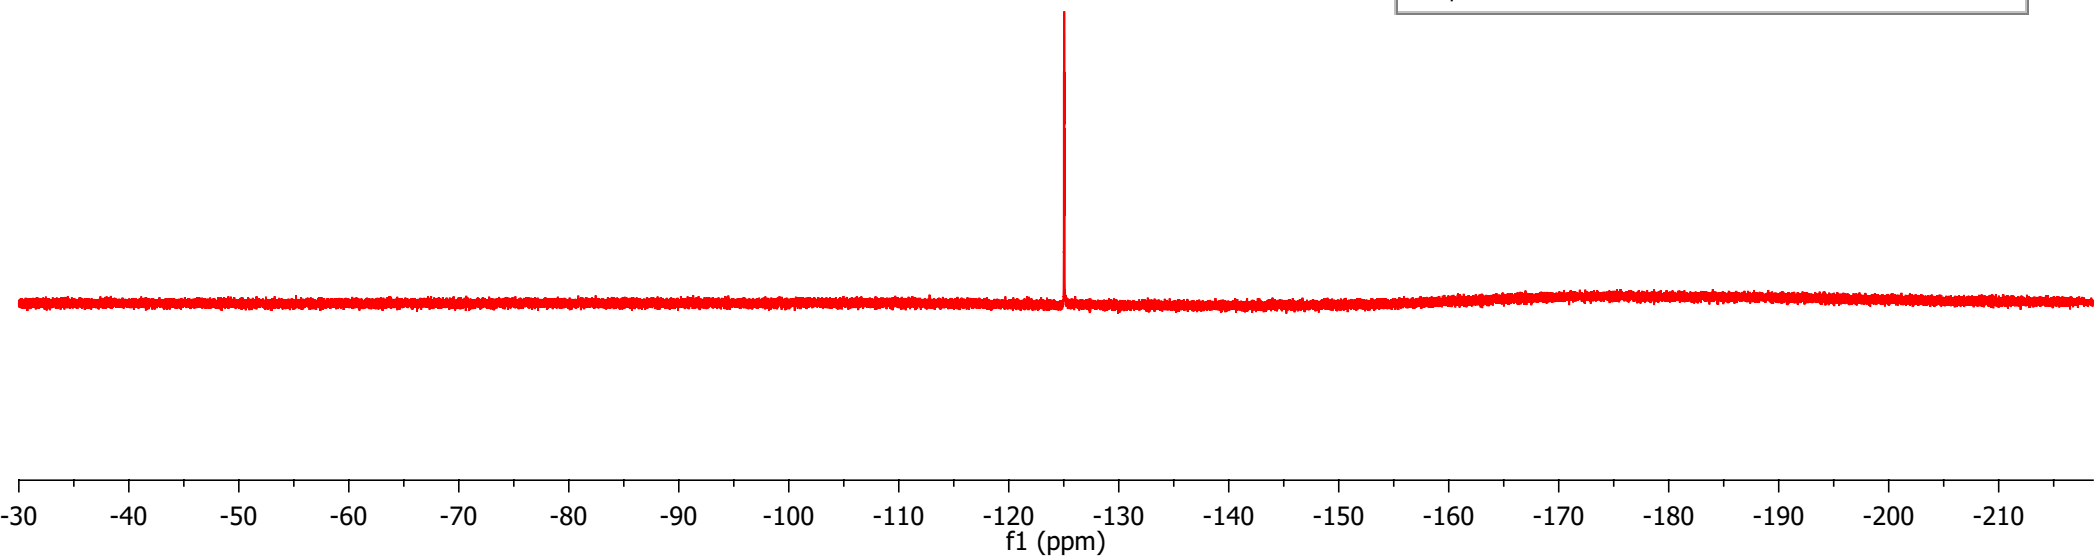

164.53  
162.08  
161.17  
158.62

147.68  
145.85

140.67  
140.61

132.01  
131.93  
129.56  
128.24  
127.88  
127.43

124.35  
124.31

121.23  
118.93  
118.27  
117.75  
117.12  
116.92

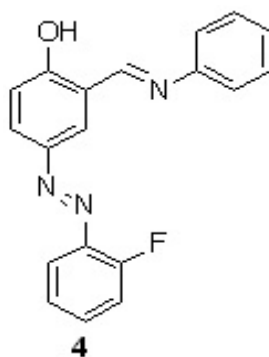

| Parameter                 | Value                                                                                                             |
|---------------------------|-------------------------------------------------------------------------------------------------------------------|
| 1 Data File Name          | D:/ Drive-16GB/ SAMRIDHI/ bruker data/ samridhi-chapter-1/ Final/ MONOFLUORO-DOWN-SCHIFF-BASE/ SKM-52 NMR/ 2/ fid |
| 2 Title                   | SKM-52 NMR                                                                                                        |
| 3 Comment                 | SKM-52-1H                                                                                                         |
| 4 Origin                  | Bruker BioSpin GmbH                                                                                               |
| 5 Owner                   | nmrsu                                                                                                             |
| 6 Site                    |                                                                                                                   |
| 7 Spectrometer            | spect                                                                                                             |
| 8 Author                  |                                                                                                                   |
| 9 Solvent                 | CDC13                                                                                                             |
| 10 Temperature            | 298.2                                                                                                             |
| 11 Pulse Sequence         | zgpg30                                                                                                            |
| 12 Number of Scans        | 735                                                                                                               |
| 13 Receiver Gain          | 205                                                                                                               |
| 14 Relaxation Delay       | 2.0000                                                                                                            |
| 15 Pulse Width            | 9.2500                                                                                                            |
| 16 Acquisition Time       | 1.3631                                                                                                            |
| 17 Acquisition Date       | 2022-04-22T21:45:31                                                                                               |
| 18 Modification Date      | 2022-04-22T09:15:34                                                                                               |
| 19 Spectrometer Frequency | 100.65                                                                                                            |
| 20 Spectral Width         | 24038.5                                                                                                           |
| 21 Lowest Frequency       | -1954.7                                                                                                           |
| 22 Nucleus                | 13C                                                                                                               |
| 23 Acquired Size          | 32768                                                                                                             |
| 24 Spectral Size          | 65536                                                                                                             |

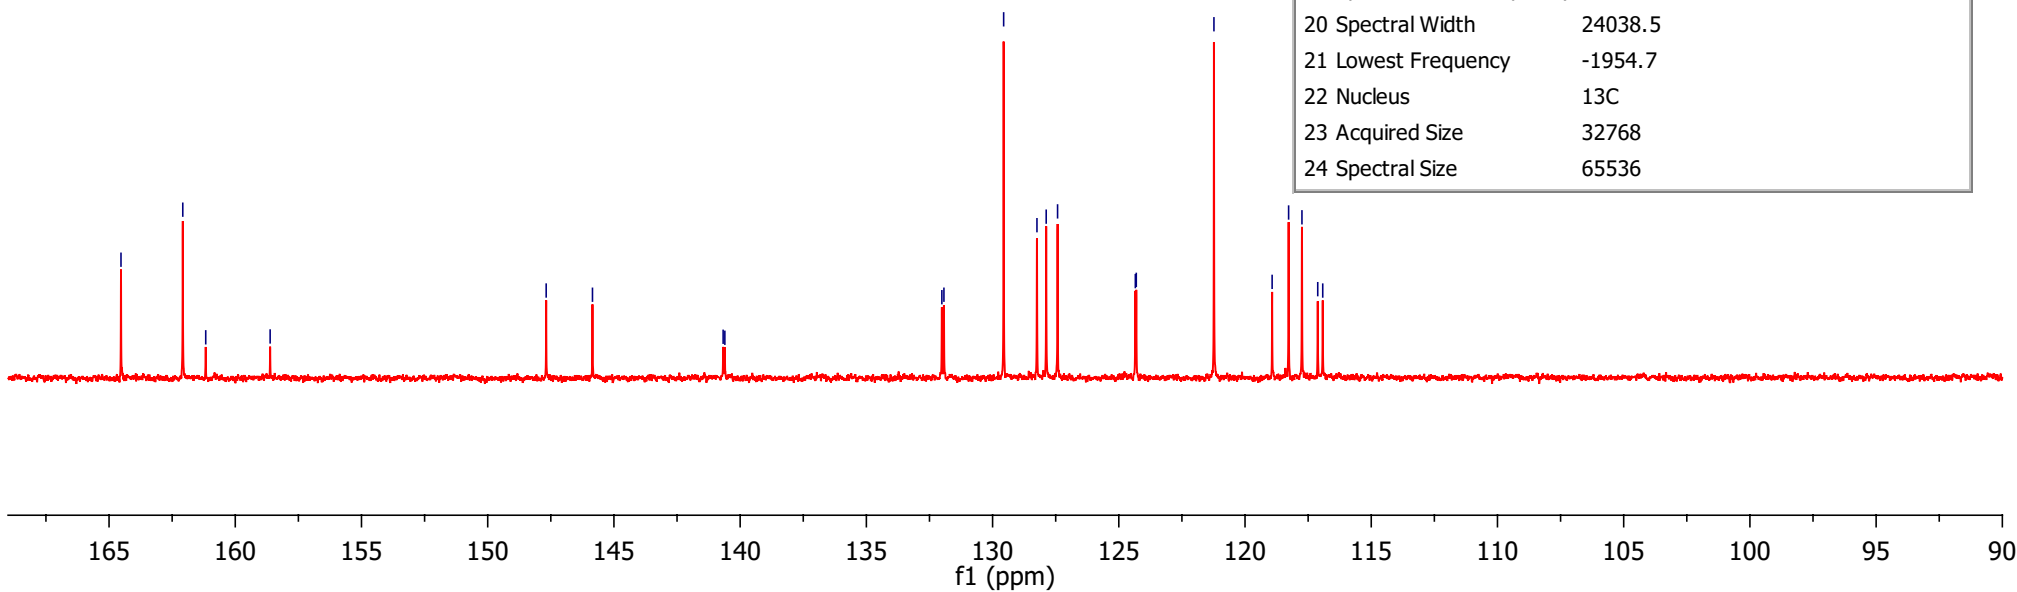

| Parameter                 | Value                                                       |
|---------------------------|-------------------------------------------------------------|
| 1 Data File Name          | D:/ Drive-16GB/ SAMRIDHI/ bruker data/ date/ SP-4-1/ 1/ fid |
| 2 Title                   | SP-4-1                                                      |
| 3 Comment                 | SP-4-1                                                      |
| 4 Origin                  | Bruker BioSpin GmbH                                         |
| 5 Owner                   | nmr                                                         |
| 6 Site                    |                                                             |
| 7 Spectrometer            | spect                                                       |
| 8 Author                  |                                                             |
| 9 Solvent                 | CDCl3                                                       |
| 10 Temperature            | 295.9                                                       |
| 11 Pulse Sequence         | zg30                                                        |
| 12 Number of Scans        | 16                                                          |
| 13 Receiver Gain          | 32                                                          |
| 14 Relaxation Delay       | 1.0000                                                      |
| 15 Pulse Width            | 13.3000                                                     |
| 16 Acquisition Time       | 4.0894                                                      |
| 17 Acquisition Date       | 2021-01-11T12:55:04                                         |
| 18 Modification Date      | 2021-01-11T12:55:06                                         |
| 19 Spectrometer Frequency | 400.13                                                      |
| 20 Spectral Width         | 8012.8                                                      |
| 21 Lowest Frequency       | -1545.7                                                     |
| 22 Nucleus                | 1H                                                          |
| 23 Acquired Size          | 32768                                                       |
| 24 Spectral Size          | 65536                                                       |

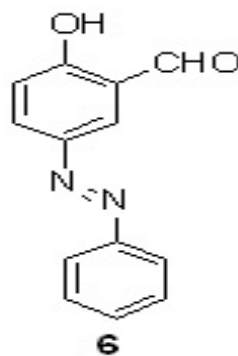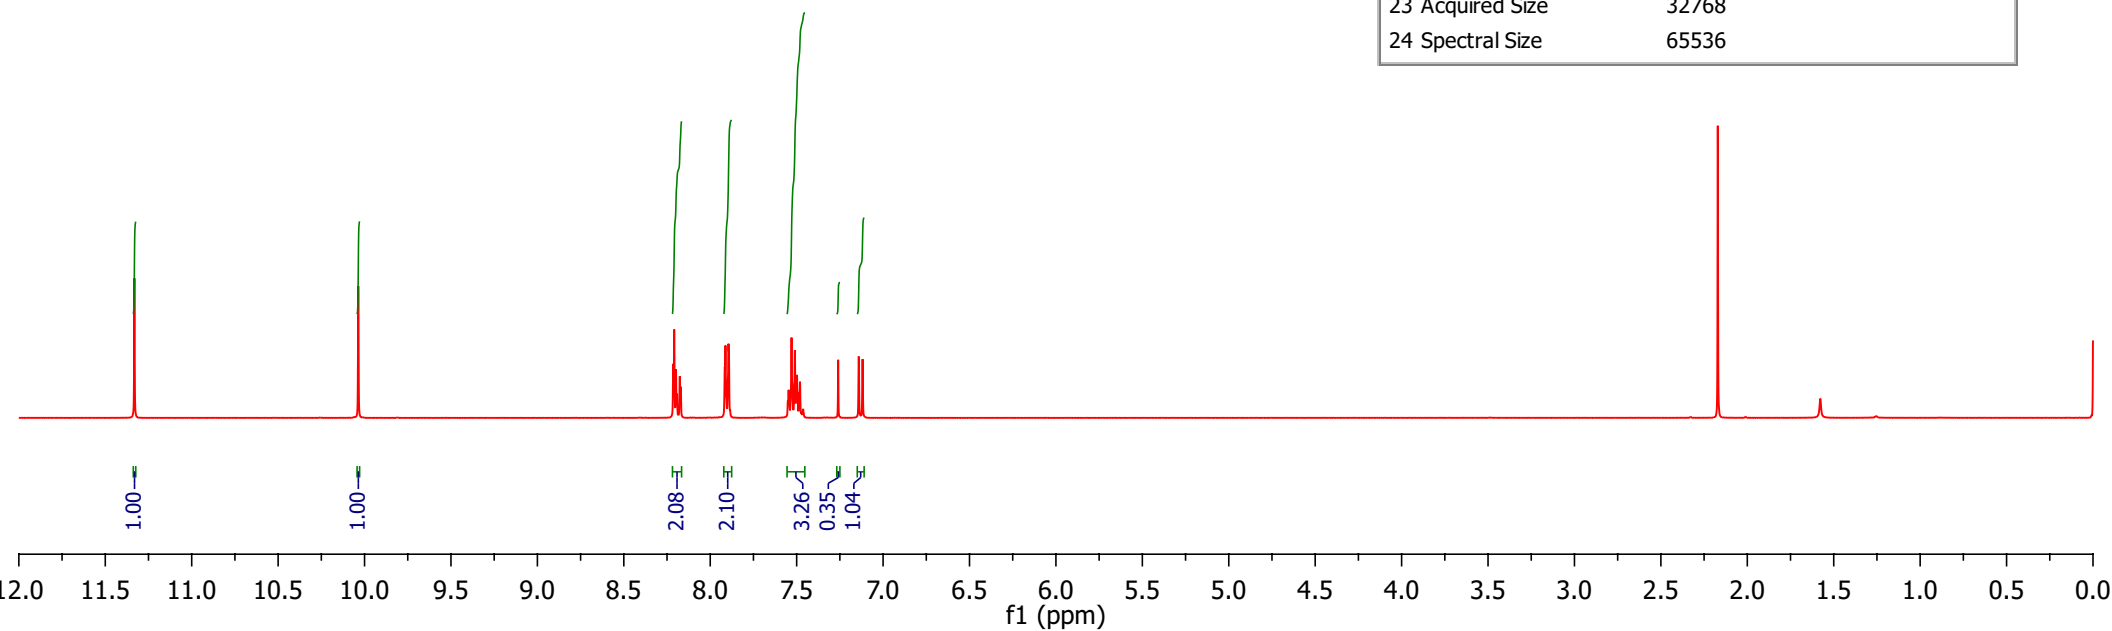

| Parameter                 | Value                                                                                                            |
|---------------------------|------------------------------------------------------------------------------------------------------------------|
| 1 Data File Name          | D:/ Drive-16GB/ SAMRIDHI/ bruker data/ samridhi-chapter-1/ spectra/ New folder (3)/ DIAZO-2F/ SKM-50 NMR/ 1/ fid |
| 2 Title                   | SKM-50-1                                                                                                         |
| 3 Comment                 | SKM-50-1 1H                                                                                                      |
| 4 Origin                  | Bruker BioSpin GmbH                                                                                              |
| 5 Owner                   | nmrsu                                                                                                            |
| 6 Site                    |                                                                                                                  |
| 7 Spectrometer            | spect                                                                                                            |
| 8 Author                  |                                                                                                                  |
| 9 Solvent                 | CDCl3                                                                                                            |
| 10 Temperature            | 298.1                                                                                                            |
| 11 Pulse Sequence         | zg30                                                                                                             |
| 12 Number of Scans        | 32                                                                                                               |
| 13 Receiver Gain          | 205                                                                                                              |
| 14 Relaxation Delay       | 1.0000                                                                                                           |
| 15 Pulse Width            | 13.6000                                                                                                          |
| 16 Acquisition Time       | 1.9999                                                                                                           |
| 17 Acquisition Date       | 2022-04-20T23:22:39                                                                                              |
| 18 Modification Date      | 2022-04-20T10:52:40                                                                                              |
| 19 Spectrometer Frequency | 400.28                                                                                                           |
| 20 Spectral Width         | 8012.8                                                                                                           |
| 21 Lowest Frequency       | -1540.6                                                                                                          |
| 22 Nucleus                | 1H                                                                                                               |
| 23 Acquired Size          | 16025                                                                                                            |
| 24 Spectral Size          | 32768                                                                                                            |

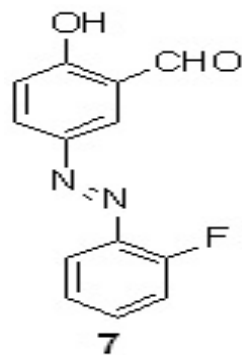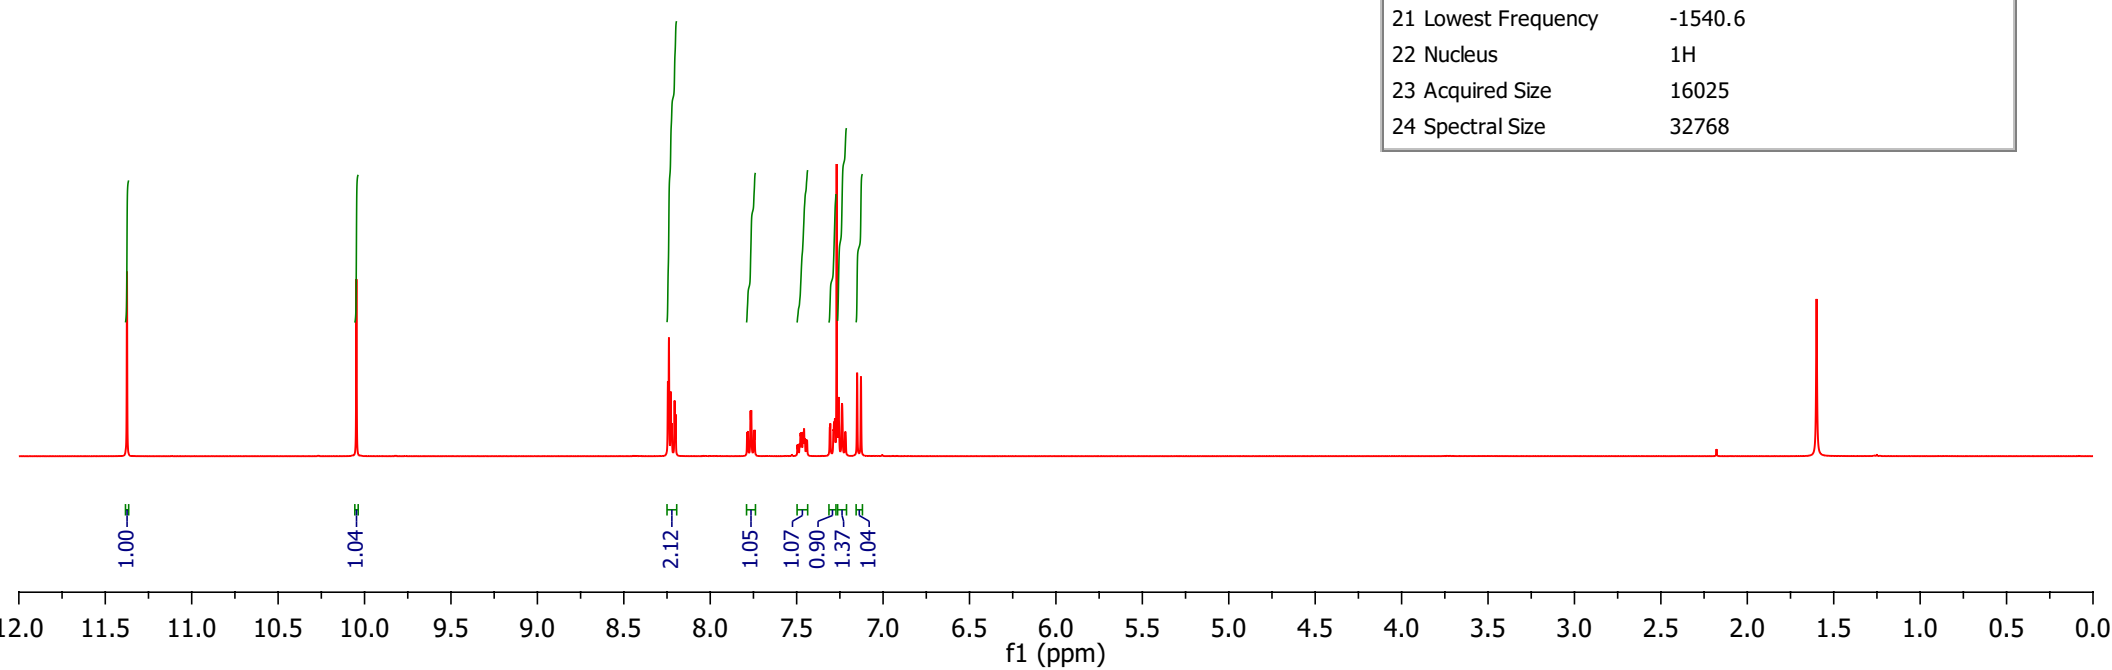

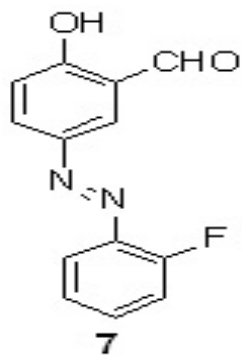

| Parameter                 | Value                                                                                                            |
|---------------------------|------------------------------------------------------------------------------------------------------------------|
| 1 Data File Name          | D:/ Drive-16GB/ SAMRIDHI/ bruker data/ samridhi-chapter-1/ spectra/ New folder (3)/ DIAZO-2F/ SKM-50 NMR/ 3/ fid |
| 2 Title                   | SKM-50-1                                                                                                         |
| 3 Comment                 | SKM-50-1 F19                                                                                                     |
| 4 Origin                  | Bruker BioSpin GmbH                                                                                              |
| 5 Owner                   | nmrsu                                                                                                            |
| 6 Site                    |                                                                                                                  |
| 7 Spectrometer            | spect                                                                                                            |
| 8 Author                  |                                                                                                                  |
| 9 Solvent                 | CDCl3                                                                                                            |
| 10 Temperature            | 298.1                                                                                                            |
| 11 Pulse Sequence         | zgfgqn                                                                                                           |
| 12 Number of Scans        | 16                                                                                                               |
| 13 Receiver Gain          | 205                                                                                                              |
| 14 Relaxation Delay       | 1.0000                                                                                                           |
| 15 Pulse Width            | 14.5000                                                                                                          |
| 16 Acquisition Time       | 0.7340                                                                                                           |
| 17 Acquisition Date       | 2022-04-20T23:35:32                                                                                              |
| 18 Modification Date      | 2022-04-20T11:05:34                                                                                              |
| 19 Spectrometer Frequency | 376.64                                                                                                           |
| 20 Spectral Width         | 89285.7                                                                                                          |
| 21 Lowest Frequency       | -82306.8                                                                                                         |
| 22 Nucleus                | 19F                                                                                                              |
| 23 Acquired Size          | 65536                                                                                                            |
| 24 Spectral Size          | 131072                                                                                                           |

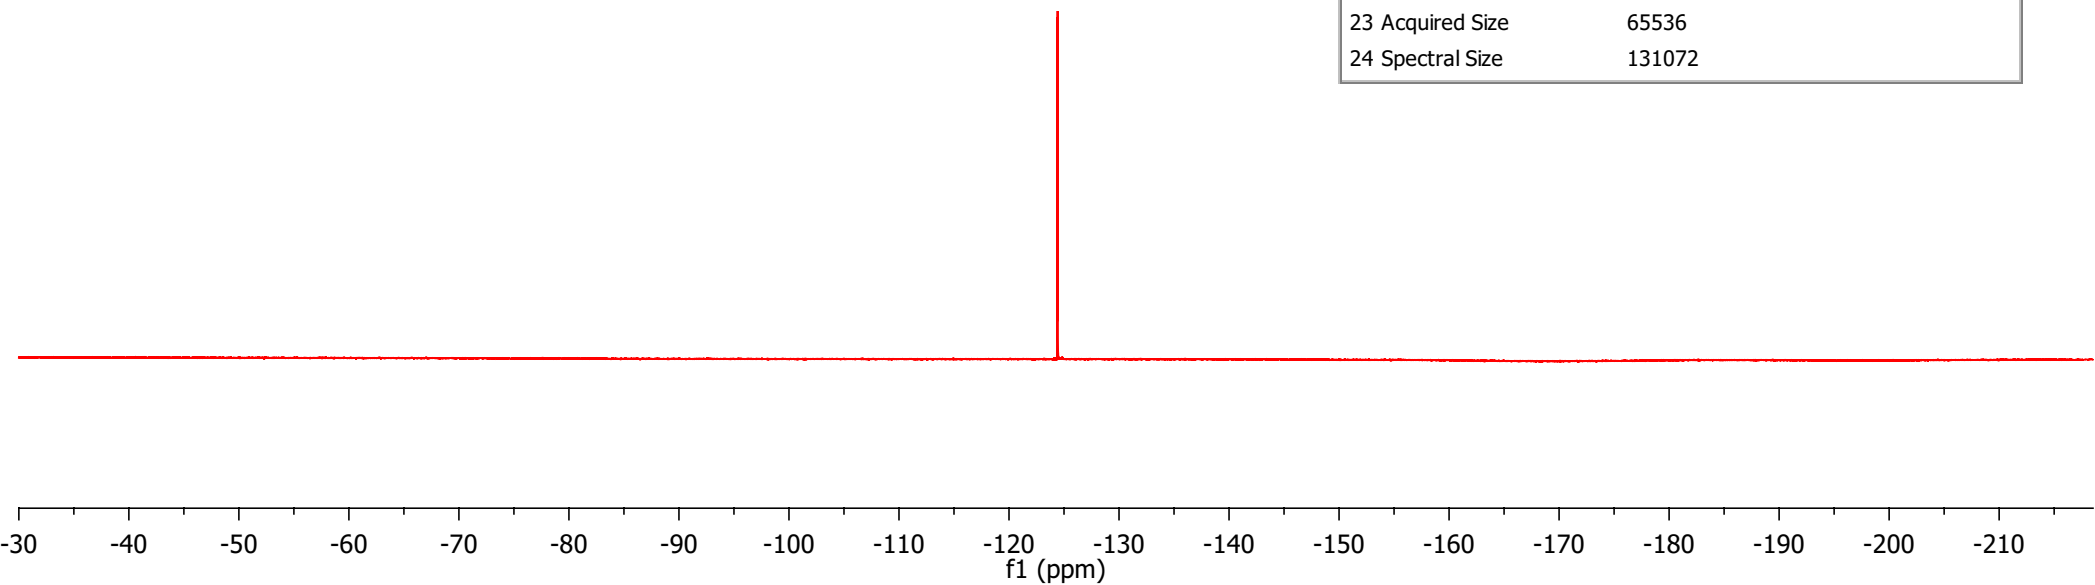

—164.11  
—161.33  
—158.77

—146.17

—140.36

—132.59  
—132.51  
—131.09  
—129.55

—124.39  
—124.35

—120.30  
—118.69  
—117.69  
—117.24  
—117.04

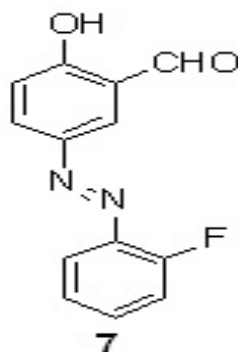

| Parameter                 | Value                                                                                                           |
|---------------------------|-----------------------------------------------------------------------------------------------------------------|
| 1 Data File Name          | D:/ Drive-16GB/ SAMRIDHI/bruker data/ samridhi-chapter-1/ spectra/ New folder (3)/ DIAZO-2F/ SKM-50 NMR/ 2/ fid |
| 2 Title                   | SKM-50 NMR                                                                                                      |
| 3 Comment                 | SKM-50-1                                                                                                        |
| 4 Origin                  | Bruker BioSpin GmbH                                                                                             |
| 5 Owner                   | nmrsu                                                                                                           |
| 6 Site                    |                                                                                                                 |
| 7 Spectrometer            | spect                                                                                                           |
| 8 Author                  |                                                                                                                 |
| 9 Solvent                 | CDCl3                                                                                                           |
| 10 Temperature            | 298.2                                                                                                           |
| 11 Pulse Sequence         | zgpg30                                                                                                          |
| 12 Number of Scans        | 1783                                                                                                            |
| 13 Receiver Gain          | 205                                                                                                             |
| 14 Relaxation Delay       | 2.0000                                                                                                          |
| 15 Pulse Width            | 9.2500                                                                                                          |
| 16 Acquisition Time       | 1.3631                                                                                                          |
| 17 Acquisition Date       | 2022-04-20T23:17:22                                                                                             |
| 18 Modification Date      | 2022-04-20T10:47:24                                                                                             |
| 19 Spectrometer Frequency | 100.65                                                                                                          |
| 20 Spectral Width         | 24038.5                                                                                                         |
| 21 Lowest Frequency       | -1954.7                                                                                                         |
| 22 Nucleus                | 13C                                                                                                             |
| 23 Acquired Size          | 32768                                                                                                           |
| 24 Spectral Size          | 65536                                                                                                           |

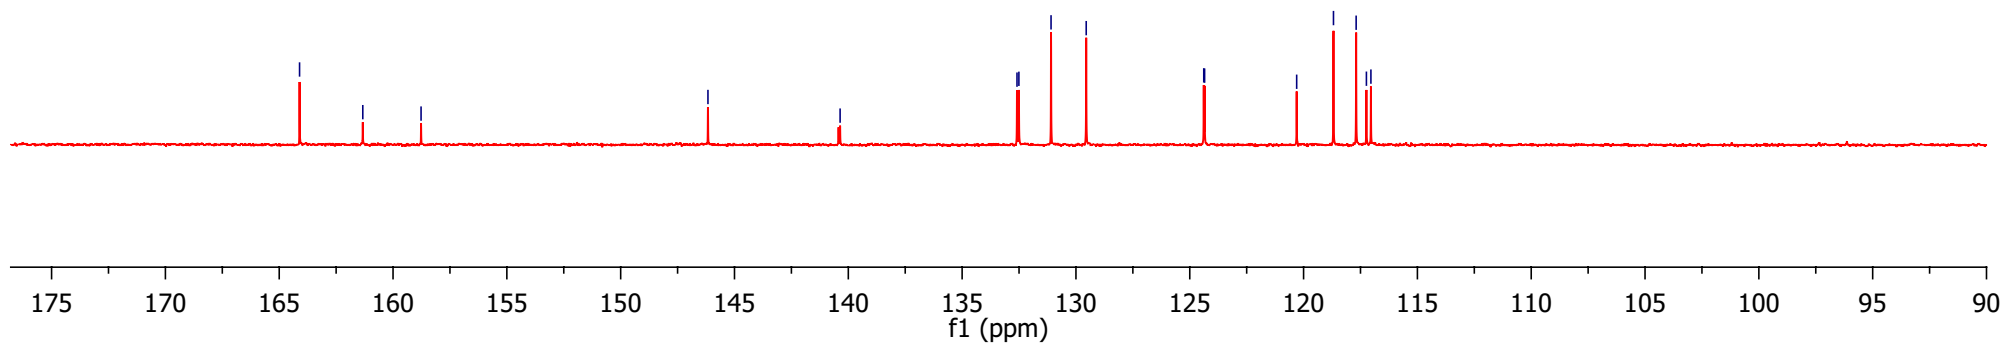

Supplement: d4nj00637b1.pdf [file d4nj00637b1.pdf]
